# Supplementary material for: The Efficacy and Safety of Herbal Medicine with Pirfenidone in the Treatment of Idiopathic Pulmonary Fibrosis: A Systematic Review
Source: MDPI journal article supplement (doi:10.3390/pr10122477), 2022-11-22
Supplement: s1 [file s1]

Archive with 1 entries (1 files):
- processes-2034151-supplementary.pdf
